# Supplementary material
Source: publisher figshare collection journal article supplement (https://geolsoc.figshare.com/ndownloader/files/25778036)

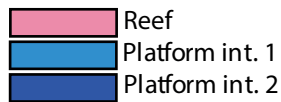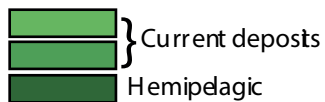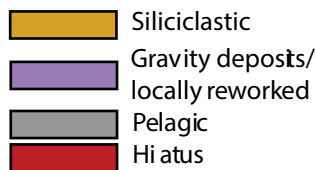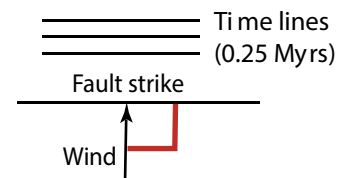

Model Run 3: slip  
rate

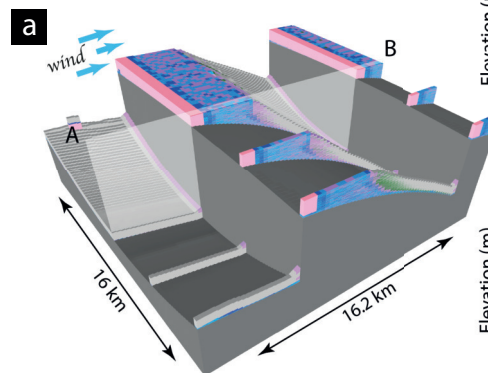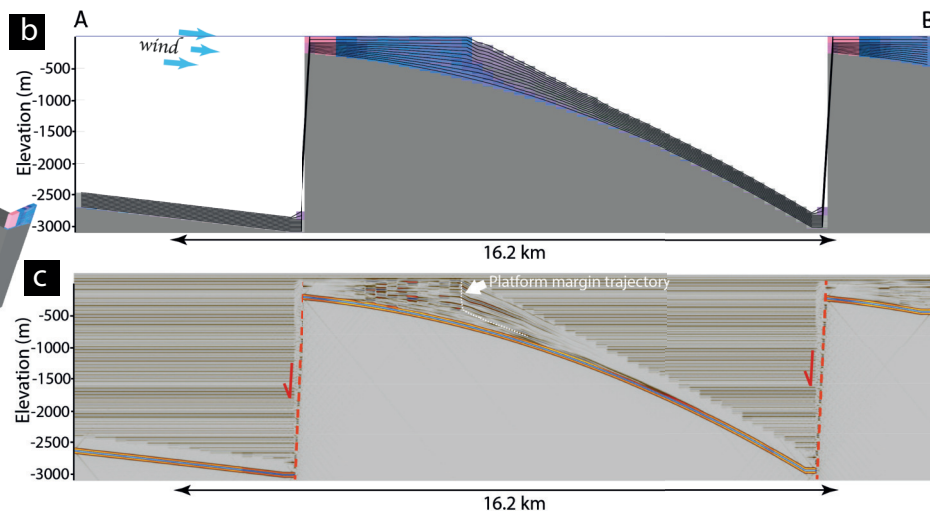

Model Run 4: base  
model

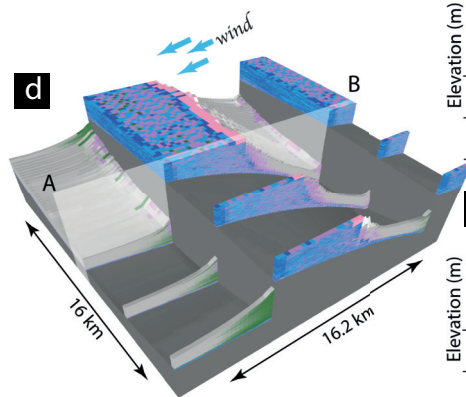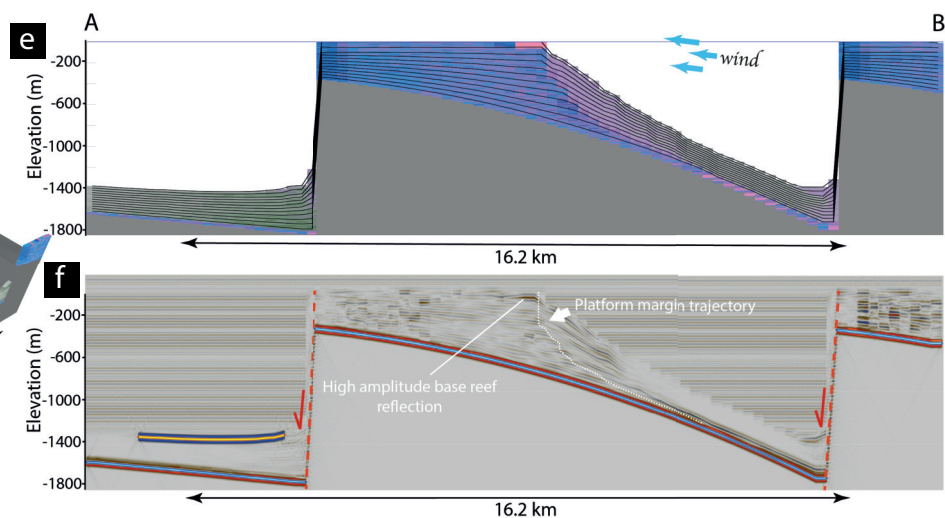

Supplement: Supplementary file 1 [file 25778036]
